# Supplementary material for: Induction of trimeric [Mg3(OH)(CO2)6] in a porous framework by a desymmetrized tritopic ligand
Source: Royal Society of Chemistry journal article supplement (doi:10.1039/c2dt12215d), 2012-01-01
Supplement: c2dt12215d.pdf [file c2dt12215d.pdf]

***Electronic Supplementary Information for:***

**Induction of Trimeric [Mg<sub>3</sub>(OH)(CO<sub>2</sub>)<sub>6</sub>] in a Porous Framework by a  
Desymmetrized Tritopic Ligand**

**Quanguo Zhai,<sup>a,b</sup> Qipu Lin,<sup>a</sup> Tao Wu,<sup>a</sup> Shou-Tian Zheng,<sup>c</sup> Xianhui Bu,<sup>\*c</sup> Pingyun Feng<sup>\*a</sup>**

<sup>a</sup>*Department of Chemistry, University of California, Riverside,*

*CA 92521, USA. E-mail: [pingyun.feng@ucr.edu](mailto:pingyun.feng@ucr.edu)*

<sup>b</sup>*Key Laboratory of Macromolecular Science of Shaanxi Province,*

*School of Chemistry and Chemical Engineering, Shaanxi Normal*

*University, Xi'an, Shaanxi, 710062, P. R. China*

<sup>c</sup>*Department of Chemistry and Biochemistry, California State*

*University, Long Beach, CA 90840, USA.*

*E-mail: [xbu@csulb.edu](mailto:xbu@csulb.edu)*

## Materials and Methods:

Mg(NO<sub>3</sub>)<sub>3</sub>·6H<sub>2</sub>O and N,N-Dimethylacetamide (DMA) were purchased from Aldrich Chemical Co. and used as received without further purification. Organic ligand pyridine-3,5-bis(phenyl-4-carboxylic acid) (H<sub>2</sub>PBPC) was purchased from Jinan Henghua Sci. & Tec. Co. Ltd. (China) and used as received.

Thermogravimetric analysis (TGA) was carried out under nitrogen atmosphere on a TA Instruments SDT Q500 thermal analyzer. Powder X-ray diffraction (XRD) data were collected on a Bruker D8 Advance powder diffractionmeter with CuK $\alpha$  radiation (40kV, 40 mA). The simulated powder pattern was calculated using single-crystal X-ray diffraction data and processed by the free Mercury 2.3 program provided by the Cambridge Crystallographic Data Centre. The sorption isotherms for N<sub>2</sub> and H<sub>2</sub> were measured by using a Micromeritics ASAP 2020 surface-area and pore-size analyzer.

Single-crystal X-ray analysis of CPF-3 was performed on a Bruker Smart APEX II CCD area diffractometer with nitrogen-flow temperature controller using graphite-monochromated MoK $\alpha$  radiation ( $\lambda = 0.71073$  Å), operating in the  $\omega$  and  $\phi$  scan mode with a scan width of 0.5°. Raw data collection and refinement were done using SMART at 150K for obtaining good diffraction data. Data reduction was performed using SAINT+ and corrected for Lorentz and polarization effects. The SADABS program [1] was used for absorption correction. The structure was solved by direct methods and the structure refinements were based on  $|F^2|$  with anisotropic displacement using SHELX-97 [2]. All non-hydrogen atoms in the framework were refined with anisotropic displacement parameters. All hydrogen atoms in the organic ligands were placed in calculated positions. The large volume fractions of disordered cations or solvents in the lattice pores could not be modelled in terms of atomic sites and were treated using the SQUEEZE routine [3] in the PLATON software package [4]. Crystal data as well as details of data collection and refinement for CPF-3 are summarized in Table S1.

- [1] G. M. Sheldrick, *SADABS, Program for Empirical Absorption Correction of Area Detector Data*; University of Göttingen, 1996.
- [2] G. M. Sheldrick, *SHELXL-97, Program for Crystal Structure Solution and Refinement*; University of Göttingen, 1997.
- [3] P. v.d. Sluis and A.L. Spek, *Acta Crystallogr., Sect. A*, 1990, 46, 194.
- [4] A.L. Spek, *J. Appl. Crystallogr.*, 2003, 36, 7

**Table S1.** Crystal data and structure refinement for CPF-3 (SQUEEZE).

|                                              |                                                                                |
|----------------------------------------------|--------------------------------------------------------------------------------|
| Empirical formula                            | C <sub>57</sub> H <sub>33</sub> N <sub>3</sub> O <sub>13</sub> Mg <sub>3</sub> |
| Formula weight                               | 1040.79                                                                        |
| Temperature (K)                              | 150(2)                                                                         |
| Crystal system, Space group                  | Rhombohedral <i>R</i> -3 <i>c</i>                                              |
| Unit cell dimensions                         | <i>a</i> = 19.4789(3) Å                                                        |
|                                              | <i>b</i> = 19.4789(3) Å                                                        |
|                                              | <i>c</i> = 45.5070(12) Å                                                       |
|                                              | <i>V</i> = 14953.3(5) Å <sup>3</sup>                                           |
| Z, Density(cal.)                             | 6, 0.693 g/cm <sup>3</sup>                                                     |
| Absorption coefficient                       | 0.066 mm <sup>-1</sup>                                                         |
| F(000)                                       | 3216                                                                           |
| Crystal Size (mm)                            | 0.40 × 0.40 × 0.40                                                             |
| Theta range for data collection              | 1.50 to 25.02                                                                  |
| Limiting indices                             | -14 ≤ <i>h</i> ≤ 21, -23 ≤ <i>k</i> ≤ 13, -54 ≤ <i>l</i> ≤ 54                  |
| Reflections collected / unique               | 16968 / 2948 [R(int) = 0.0450]                                                 |
| Observed Reflection                          | 2108 ( <i>I</i> > 2σ( <i>I</i> ))                                              |
| Data Completeness measured                   | 0.998                                                                          |
| Refinement Method                            | Full-matrix least-squares on F <sup>2</sup>                                    |
| Parameter/Restraints/Data(obs.)              | 2948 / 4 / 118                                                                 |
| Goodness-of-fit                              | 1.123                                                                          |
| Final R indices ( <i>I</i> > 2σ( <i>I</i> )) | R1 = 0.0771, wR2 = 0.2336                                                      |
| R indices (all)                              | R1 = 0.0951, wR2 = 0.2446                                                      |
| Largest difference peak                      | 1.032 and -0.641 e·Å <sup>-3</sup>                                             |

$$^a R1 = \sum(|F_o| - |F_c|) / \sum|F_o|, wR2 = [\sum w(F_o^2 - F_c^2)^2 / \sum w(F_o^2)^2]^{0.5}.$$

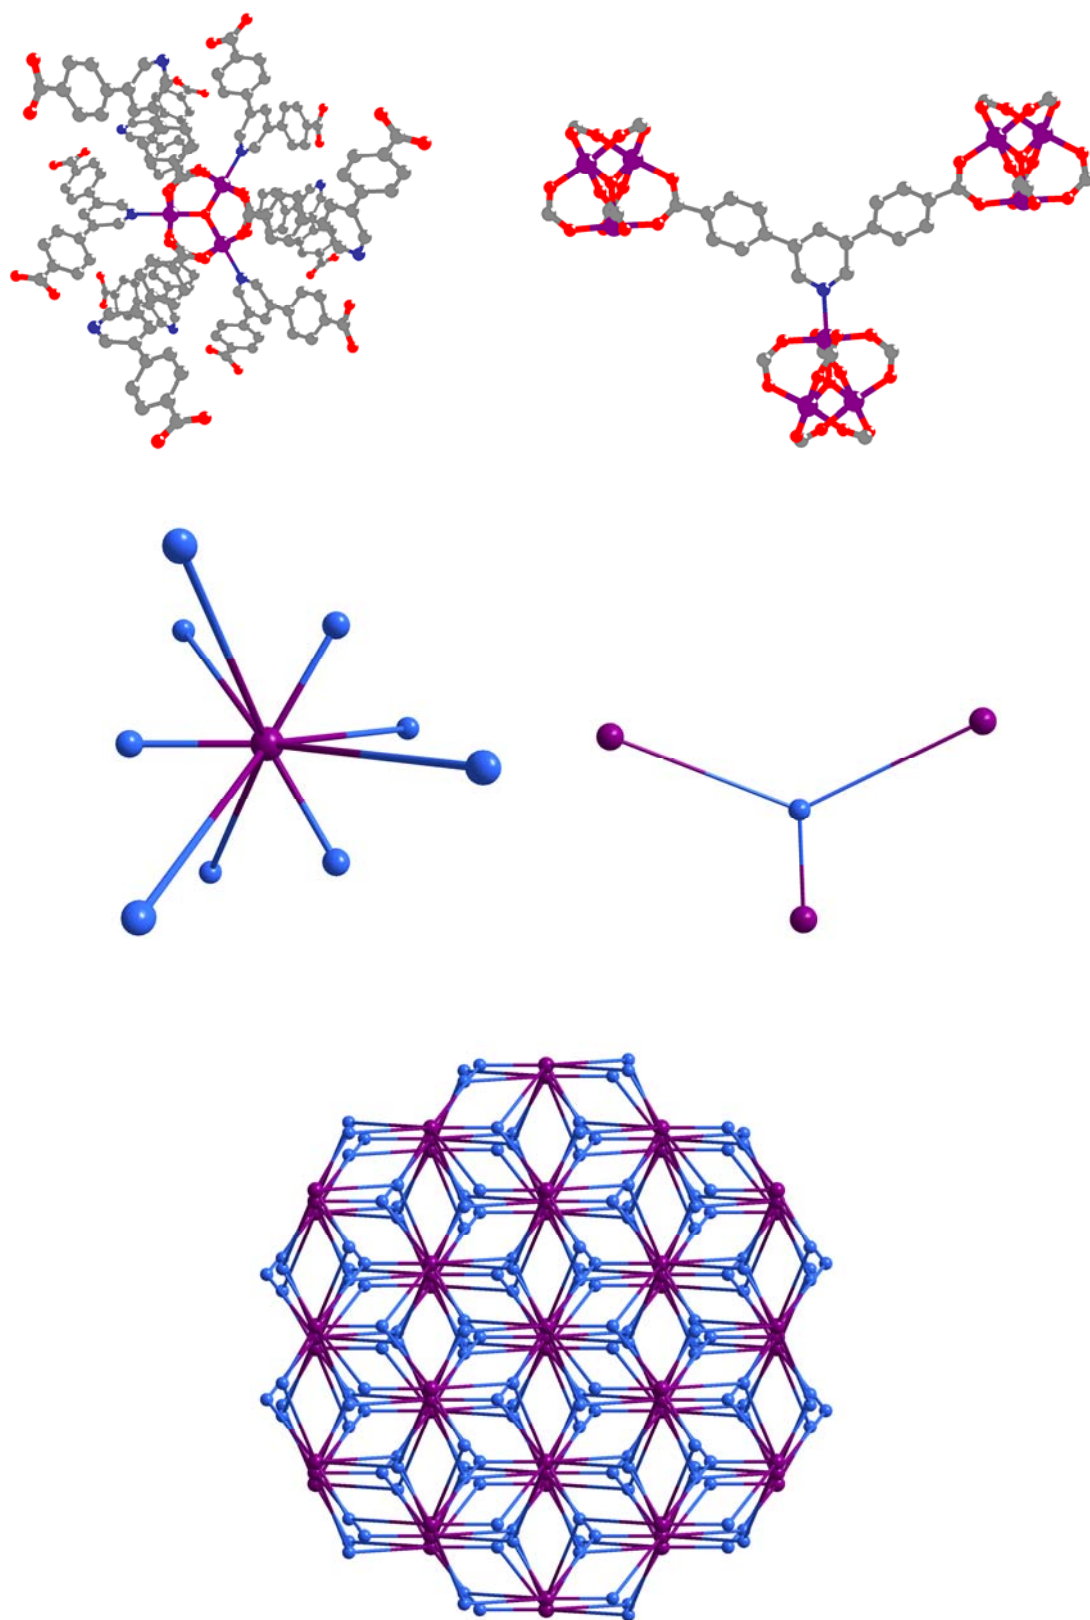

**Fig. S1** The (3,9)-connected topology analysis for CPF-3.

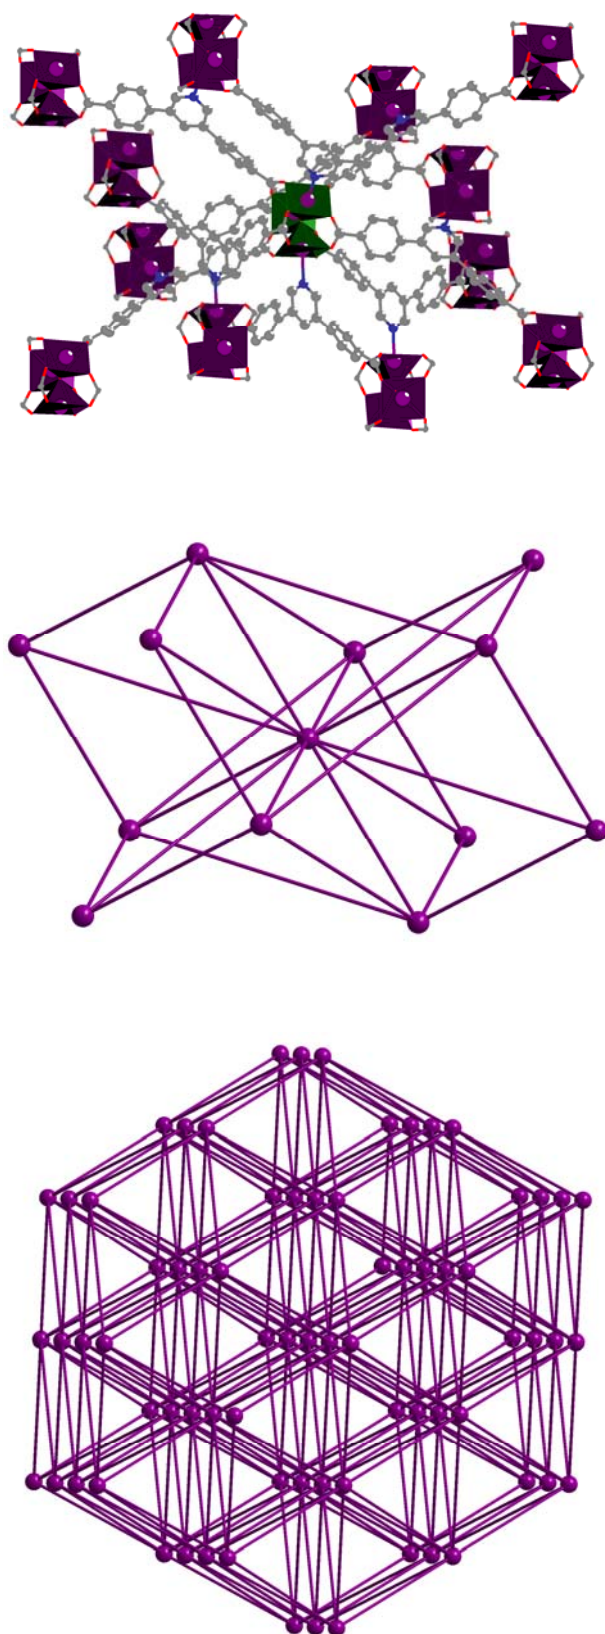

**Fig. S2** The 12-connected topology analysis for CPF-3.

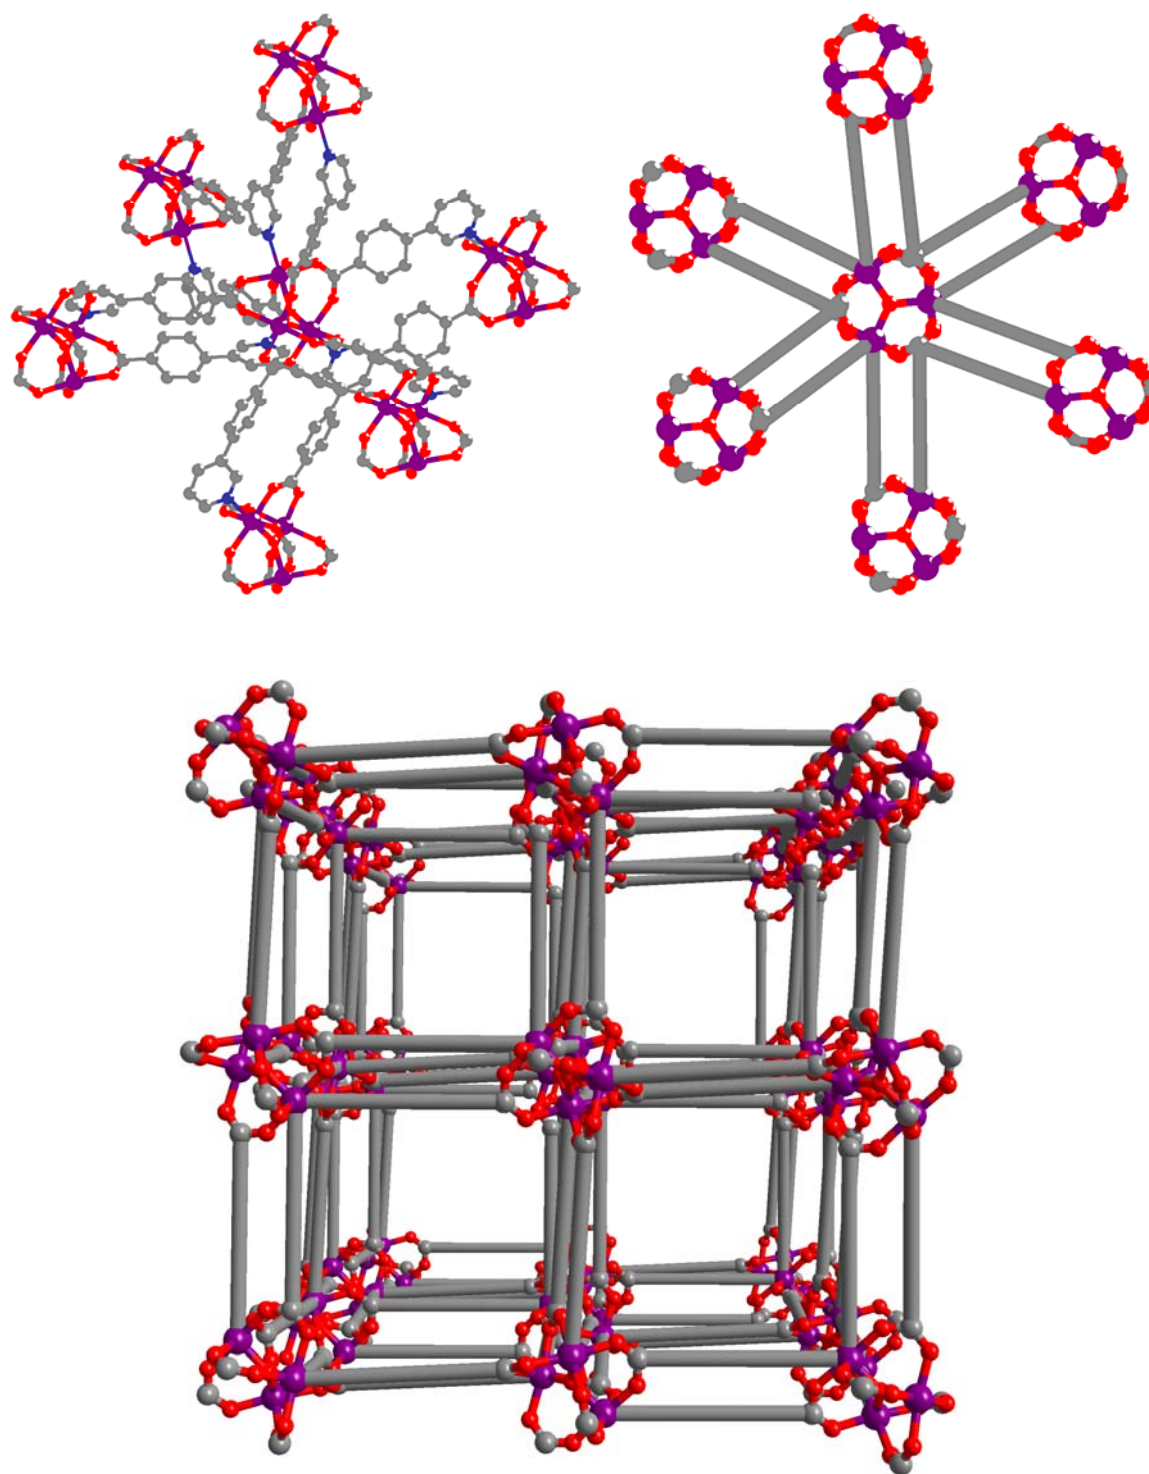

**Fig. S3** The 6-connected  $\alpha$ -Po net for CPF-3 with double linkers.



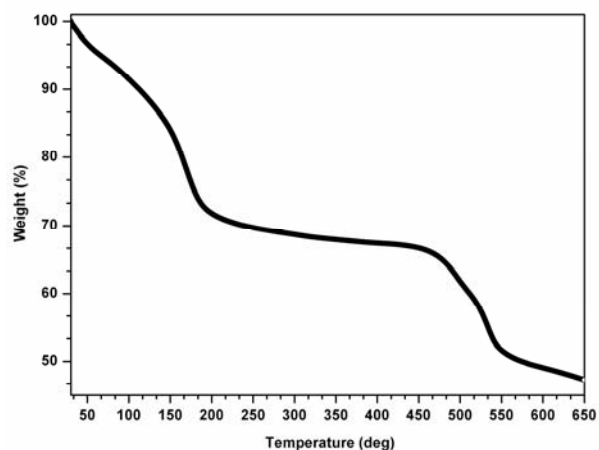

**Fig. S4.** TGA curve for CPF-3.

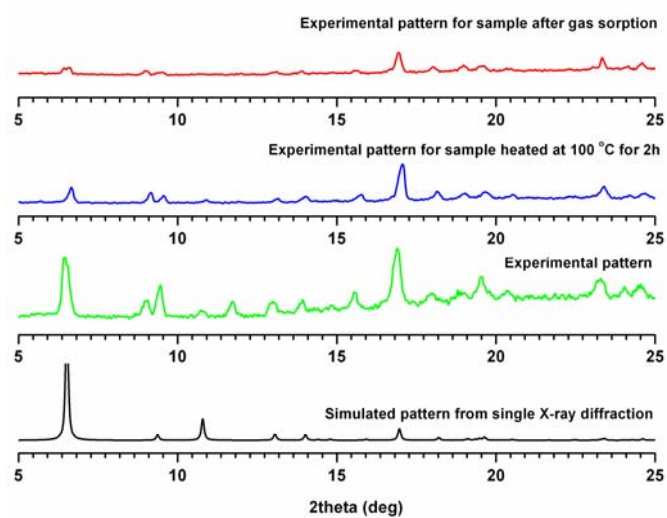

**Fig. S5.** XRPD patterns for CPF-3.

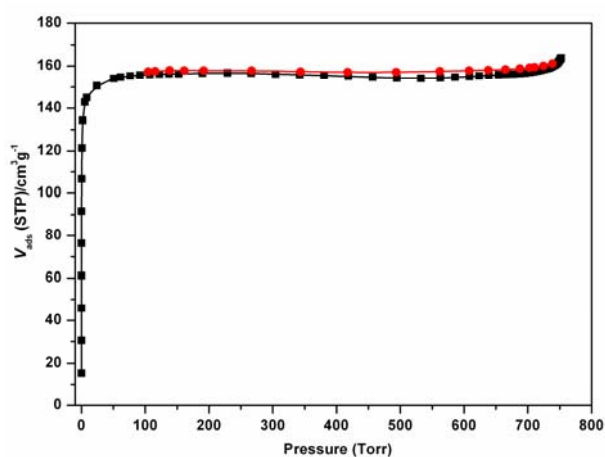

**Fig. S6** N<sub>2</sub> adsorption (black) and desorption (red) isotherms at 77 K for CPF-3.

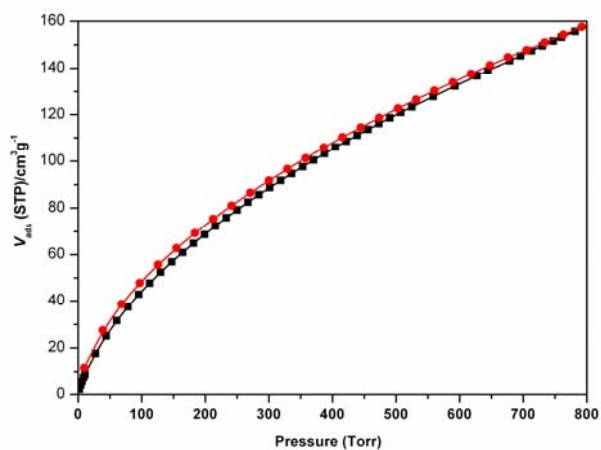

**Fig. S7** H<sub>2</sub> adsorption (black) and desorption (red) isotherms at 77 K for CPF-3.

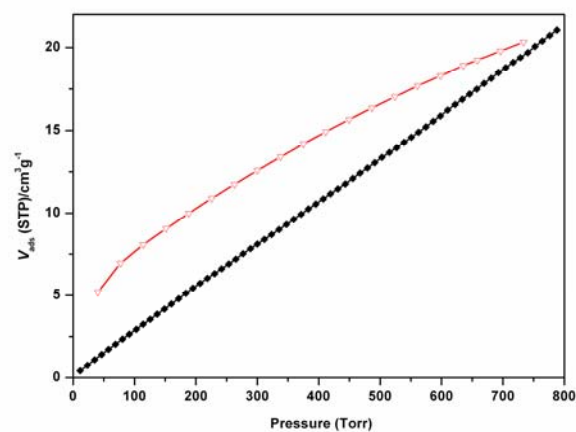

**Fig. S8** CO<sub>2</sub> adsorption (black) and desorption (red) isotherms at 298 K for CPF-3.

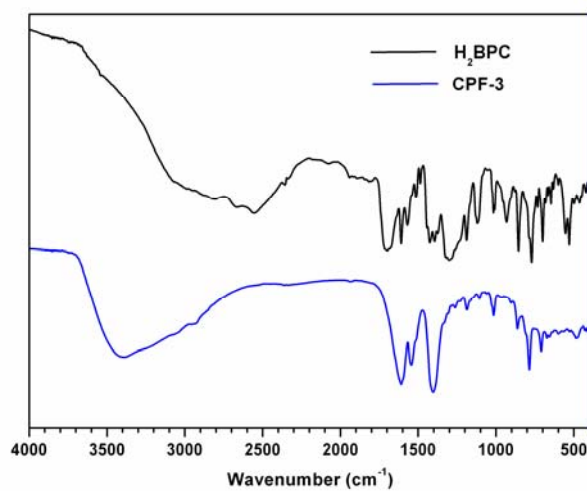

**Fig. S9.** FT-IR spectra for CPF-3 and H<sub>2</sub>BPC.
